# Supplementary material for: Mutant PIK3CA controls DUSP1-dependent ERK 1/2 activity to confer response to AKT target therapy
Source: PubMed Central journal article supplement — Br J Cancer. 2014 Nov 4;111(11):2103–13. doi: 10.1038/bjc.2014.534 (PMC4260039; doi:10.1038/bjc.2014.534), 2014-11-04

## **Titles and legends to supplementary figures**

### **Supplementary figure 1: MK-2206 sensitive cells show an increase in apoptosis and a decrease in proliferation.**

Respective cell lines were treated with 1000 nM MK-2206 for 24 hours and analysed for (A) viable cells, (B) caspase 3/7 activity and (C) cell cycle progression. All graphs indicate mean +/- S.E. expressed as percentage of control and represent at least two independent experiments. Statistical comparison was performed using the student t-test (\* indicates  $p < 0.05$ ).

### **Supplementary figure 2: Regulation of DUSP1 expression after AKT inhibition is independent of CREB.**

Cells transfected with control or CREB directed siRNA oligonucleotides were treated with indicated concentrations of MK-2206 for one hour and protein expression was analysed by immunoblotting. '+' indicates present and '-' indicates absent.

### **Supplementary figure 3: Expression of mutant *PIK3CA* sensitizes resistant cells to MK-2206 and promotes apoptosis.**

Cells transfected with either control vector (ctrl) or mutant *PIK3CA* E545K were treated for 24 hours with 1000 nM MK-2206 and analysed for (A) number of viable cells or (B) caspase 3/7 activity. All graphs indicate mean +/- S.E. expressed as percentage of control and are representative of at least two independent experiments. Statistical comparison was performed using the student t-test (\* indicates  $p < 0.05$ ).

**Supplementary figure 4: *PIK3CA* mutant cells are sensitive to MK-2206 *in vivo*.**

(A) Representative images of HT1197 and RT112 cells show tumour formation on the CAM inside a silicone ring, 6 days after seeding of cells. Scale bar equals 2 millimeters.

(B) and (C) IHC staining with indicated antibodies from representative sections was quantified from at least three different fields. Values represent mean  $\pm$  S.E. Statistical comparison was performed using the student t-test (\* indicates  $p < 0.05$ ). All results are representative of at least two independent experiments.

A

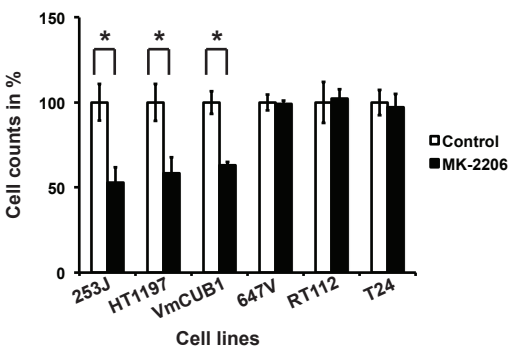

B

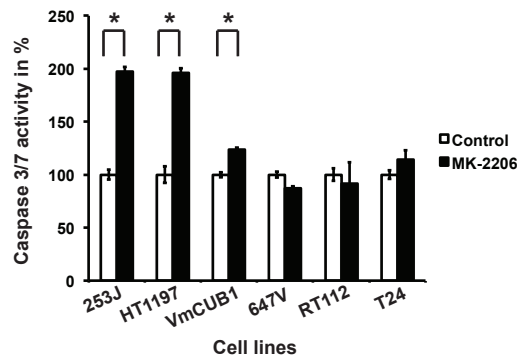

C

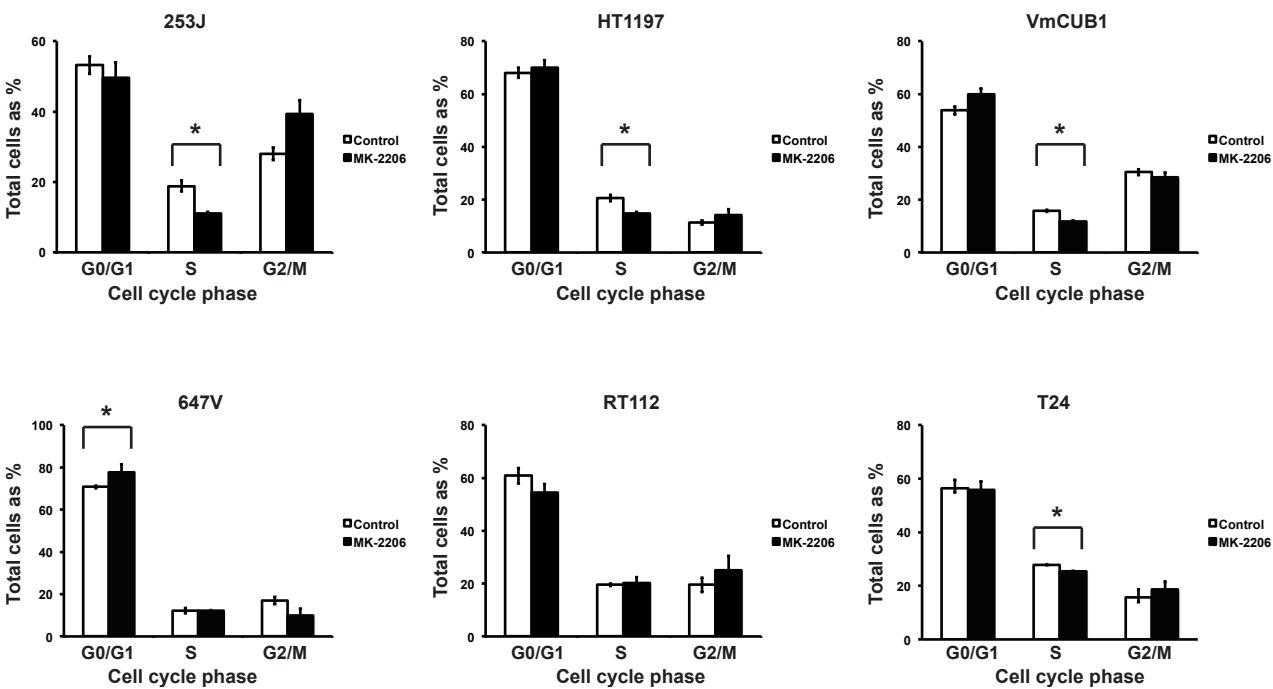

# Supplementary figure 2

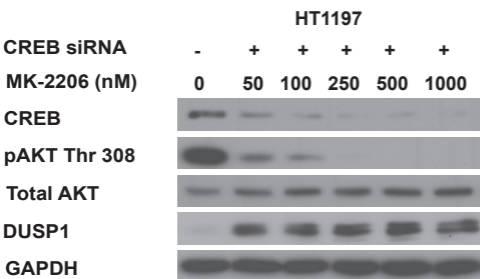

# Supplementary figure 3

**A**

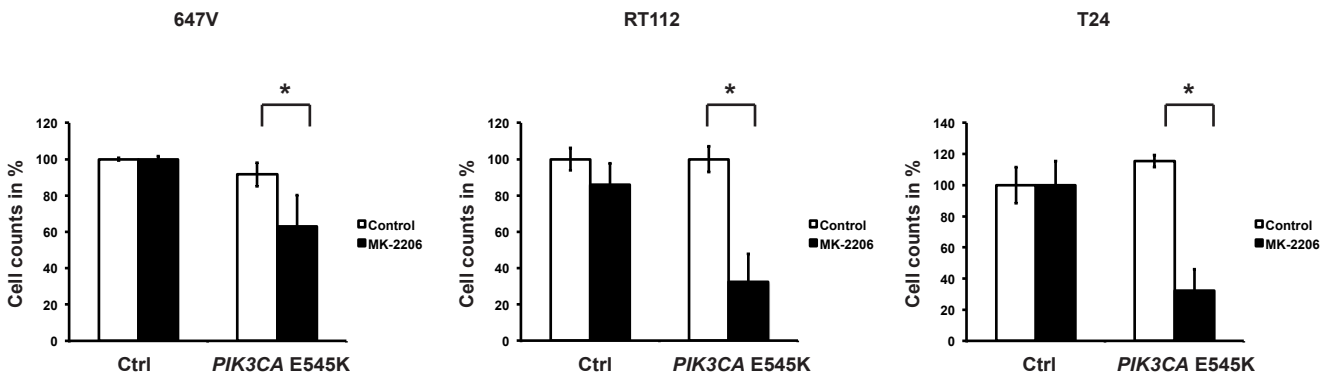

**B**

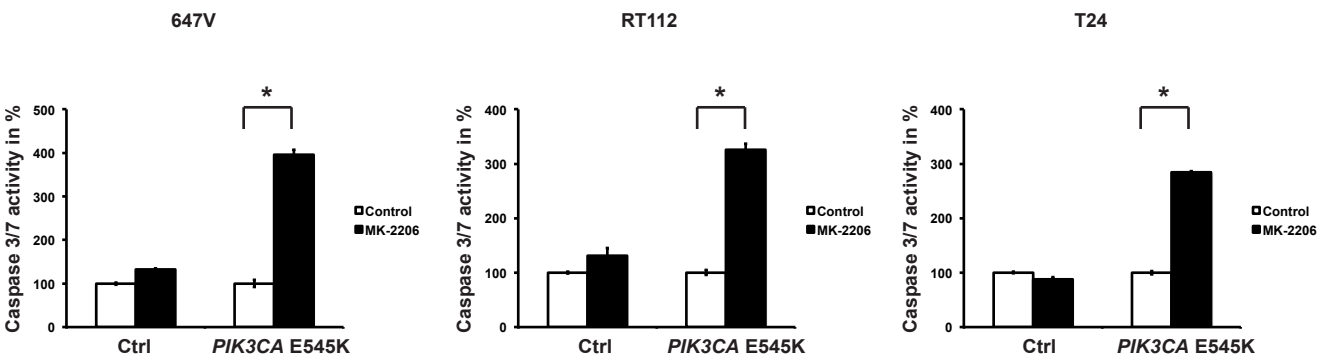

A

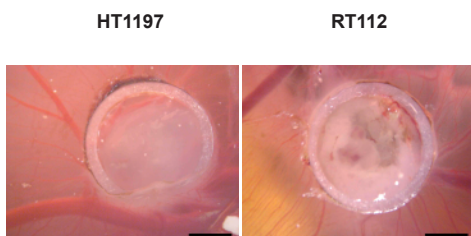

B

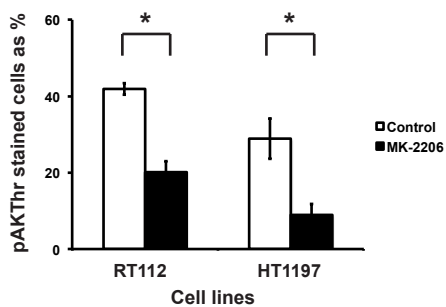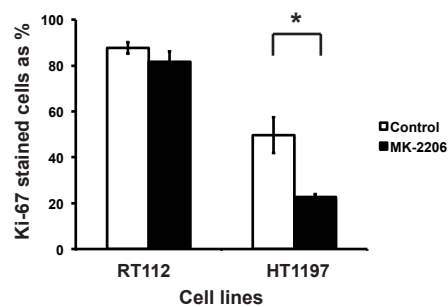

C

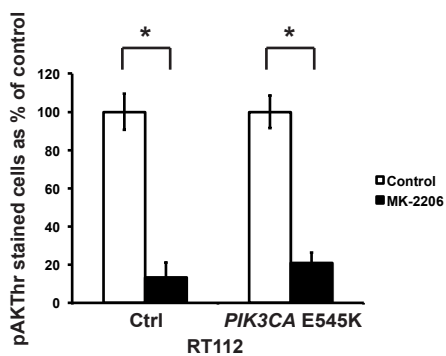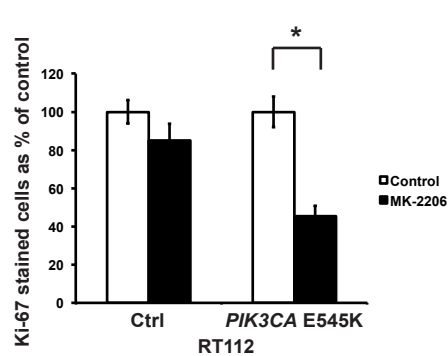

Supplement: bjc2014534x1.pdf [file bjc2014534x1.pdf]
